# Supplementary material
Source: PubMed Central journal article supplement (PMC4253847)
Supplement: embr0015-1069-sd5.pdf [file embr0015-1069-sd5.pdf]

## Supplementary Historical perspective

The functions of isolated brown adipocyte mitochondria have been intensely studied for decades. It is clear from these early studies that freshly isolated brown fat mitochondria contains significant amounts of free fatty acids which are partially responsible for the uncoupled state[1, 2]. The high sensitivity of brown fat mitochondria to uncoupling by fatty acids suggested a physiological regulator of uncoupling, from which the concept of 'fatty acid uncoupling' was developed and later confirmed and widely accepted[3]. In fact, albumin which acts as an acceptor of fatty acids must be used in isolation and respiration medium for coupled respiration to be observed. Thus, bovine serum albumin (BSA) was generally used in the respiration buffer of isolated brown adipocyte mitochondria. Perhaps due to this valuable knowledge, in early publications on oxygen consumption measurements in isolated brown adipocytes following norepinephrine stimulation, 4 % bovine serum albumin (0.6mM, equate to the concentration found in blood ) was also used in the respiration medium [4-7]. In 1979, based on the rationales that (1) brown fat when activated release fatty acids and (2) in vivo those released fatty acids are bound by albumin in blood, Nedergaard and Lindberg investigated the effect of albumin on the metabolism of isolated brown fat cells and found that the addition of albumin increases norepinephrine-induced fatty acid release and induces a more stable norepinephrine-stimulated respiration rate[8]. This study provides direct evidence that addition of albumin has beneficial effects on brown adipocytes metabolism. By using this setup, in 2000, Matthias et al. reported marked difference in oxygen consumption between isolated brown adipocytes from wild-type and UCP1 knock-out mice, both following NE stimulation and stimulation with oleate[9]. This study also showed that there was no difference in basal respiration between the two preparations demonstrating UCP1 was not active without stimulation. These observations were further confirmed by Shabalina et al. when studying the bioenergetics of wild-type and UCP1 knock-out brown-fat mitochondria[10]. In addition, investigations with trypsinized primary cultures of brown and brite cells by Petrovic et al. in 2008 and 2010, respectively, showed a correlation between UCP1 expression (as induced by rosiglitazone) and NE-stimulated oxygen consumption[11, 12]. In all these studies, UCP1-mediated leak respiration was observed when albumin was present in respiration medium using Warburg apparatus or Clark-type oxygen electrode systems. Nowadays, microplate-based respirometry has become a mainstream method for measuring UCP1-mediated leak respiration in cultured brown and brite cells. However, in the respiration buffer defined by the respirometry manufacturer albumin is absence. Notably, no studies have been performed so far to validate this setup with cultured UCP1 knock-out (KO) cells as the ultimate model to test the causality between uncoupled respiration and presence of UCP1. This relationship seems to have been taken for granted.

1. Drahotka Z, Honova E, Hahn P (1968) The effect of ATP and carnitine on the endogenous respiration of mitochondria from brown adipose tissue. *Experientia* **24**: 431-432
2. Hittelman KJ, Lindberg O, Cannon B (1969) Oxidative phosphorylation and compartmentation of fatty acid metabolism in brown fat mitochondria. *Eur J Biochem* **11**: 183-192
3. Nicholls DG, Locke RM (1984) Thermogenic mechanisms in brown fat. *Physiol Rev* **64**: 1-64

4. Fain JN, Reed N, Saperstein R (1967) The isolation and metabolism of brown fat cells. *J Biol Chem* **242**: 1887-1894
5. Reed N, Fain JN (1968) Stimulation of respiration in brown fat cells by epinephrine, dibutyryl-3',5'-adenosine monophosphate, and m-chloro(carbonyl cyanide)phenylhydrazone. *J Biol Chem* **243**: 2843-2848
6. Prusiner SB, Cannon B, Lindberg O (1968) Oxidative metabolism in cells isolated from brown adipose tissue. 1. Catecholamine and fatty acid stimulation of respiration. *Eur J Biochem* **6**: 15-22
7. Prusiner SB, Cannon B, Ching TM, Lindberg O (1968) Oxidative metabolism in cells isolated from brown adipose tissue. 2. Catecholamine regulated respiratory control. *Eur J Biochem* **7**: 51-57
8. Nedergaard J, Lindberg O (1979) Norepinephrine-stimulated fatty-acid release and oxygen consumption in isolated hamster brown-fat cells. Influence of buffers, albumin, insulin and mitochondrial inhibitors. *Eur J Biochem* **95**: 139-145
9. Matthias A, Ohlson KB, Fredriksson JM, Jacobsson A, Nedergaard J, Cannon B (2000) Thermogenic responses in brown fat cells are fully UCP1-dependent. UCP2 or UCP3 do not substitute for UCP1 in adrenergically or fatty acid-induced thermogenesis. *J Biol Chem* **275**: 25073-25081
10. Shabalina IG, Ost M, Petrovic N, Vrbacky M, Nedergaard J, Cannon B (2010) Uncoupling protein-1 is not leaky. *Biochimica et Biophysica Acta (BBA) - Bioenergetics* **1797**: 773-784
11. Petrovic N, Shabalina IG, Timmons JA, Cannon B, Nedergaard J (2008) Thermogenically competent nonadrenergic recruitment in brown preadipocytes by a PPARgamma agonist. *Am J Physiol Endocrinol Metab* **295**: E287-296
12. Petrovic N, Walden TB, Shabalina IG, Timmons JA, Cannon B, Nedergaard J (2010) Chronic peroxisome proliferator-activated receptor gamma (PPARgamma) activation of epididymally derived white adipocyte cultures reveals a population of thermogenically competent, UCP1-containing adipocytes molecularly distinct from classic brown adipocytes. *J Biol Chem* **285**: 7153-7164
