# Supplementary material
Source: PubMed Central journal article supplement (PMC4253847)

# Supplemental Figure 1

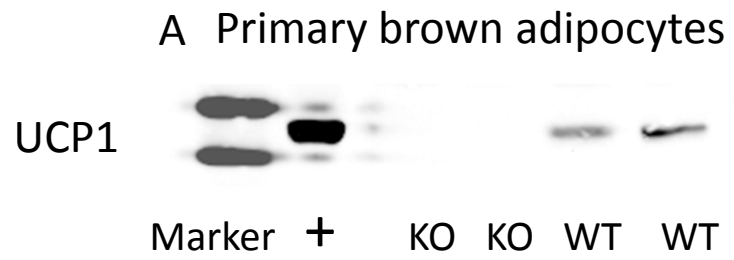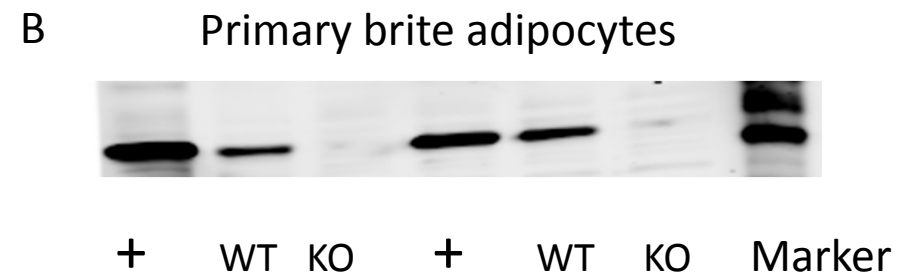

Supplemental Figure 2

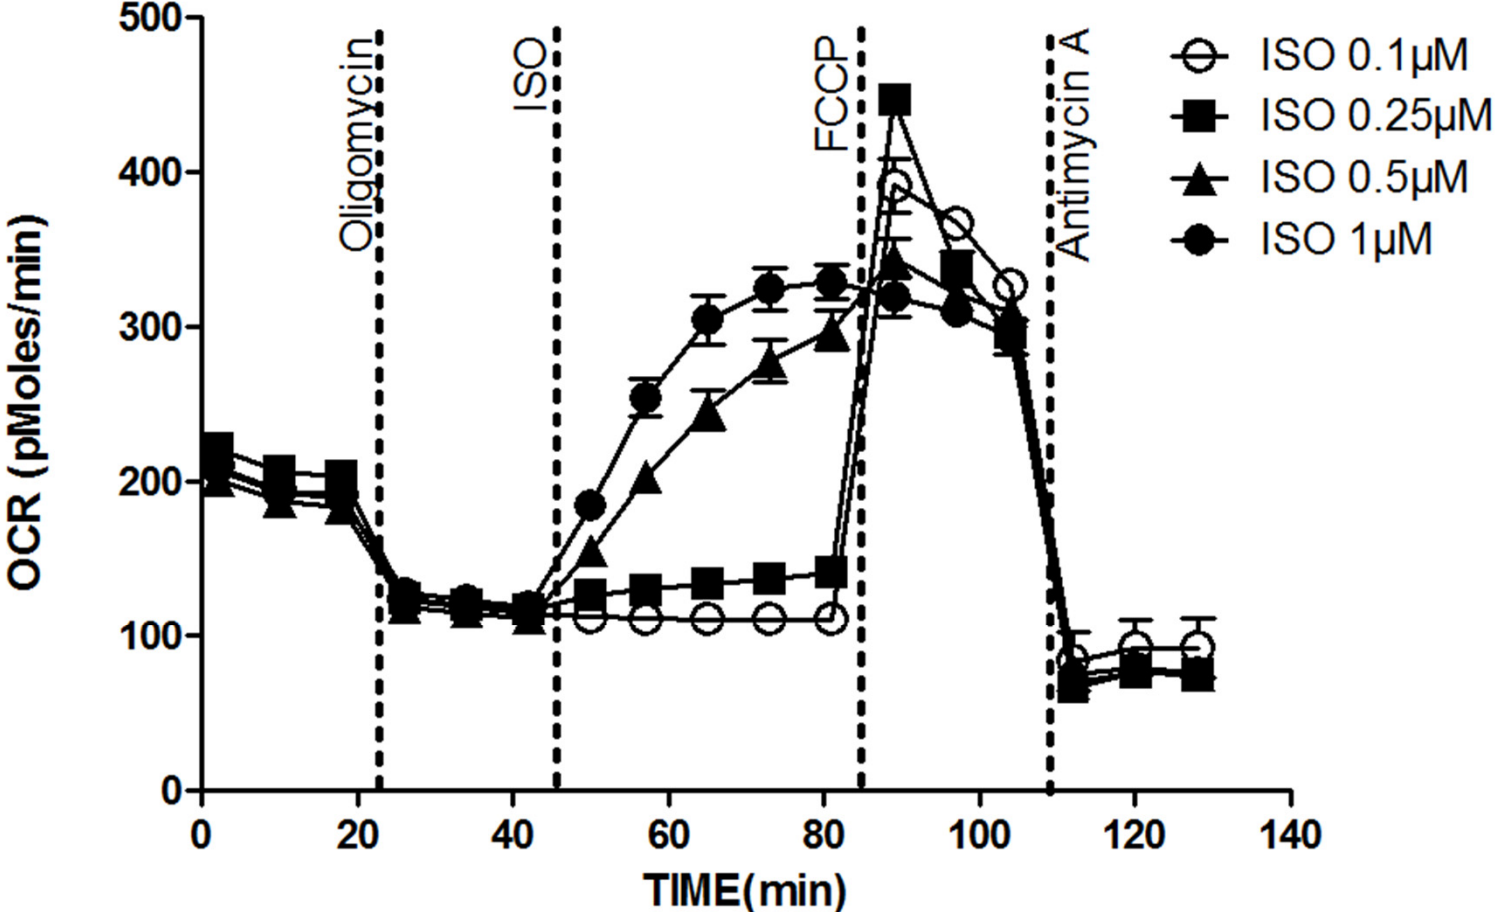

# Supplemental Figure 3

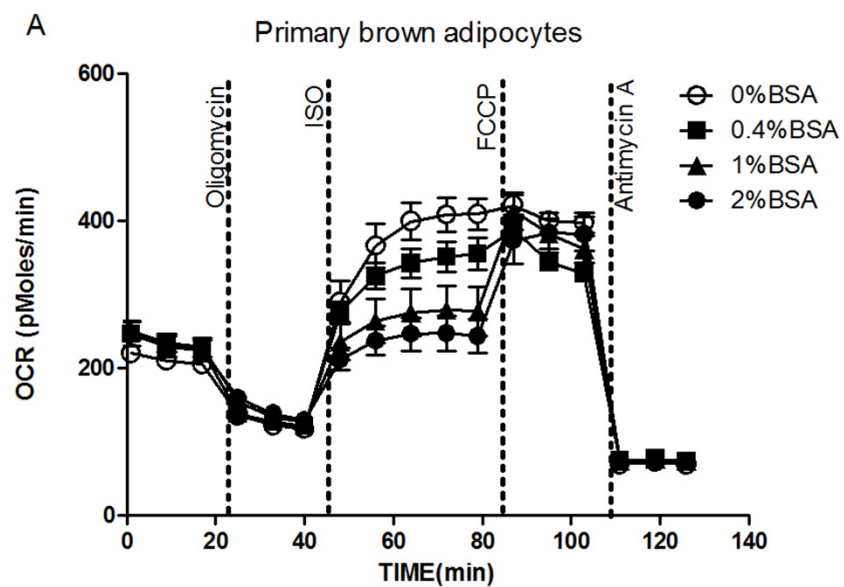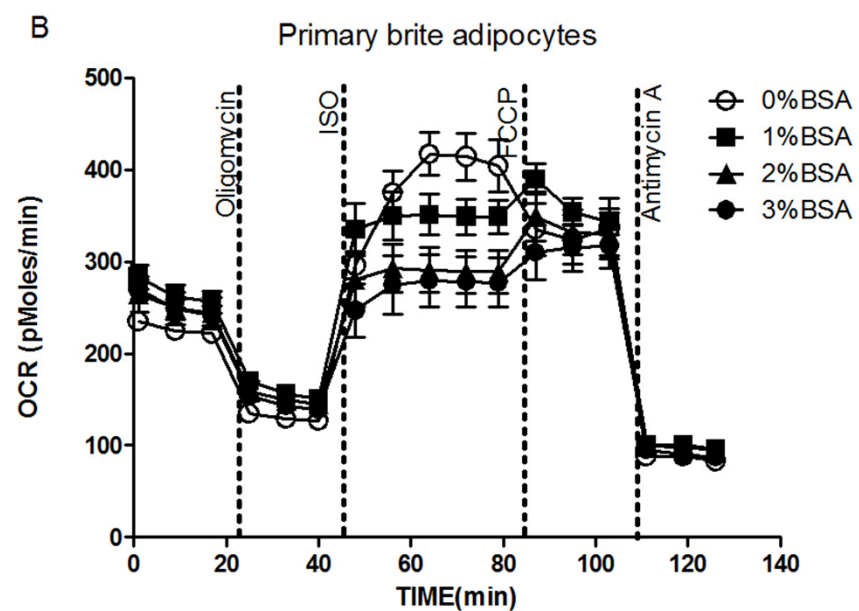

Supplement: embr0015-1069-sd1.pdf [file embr0015-1069-sd1.pdf]
